# Supplementary material for: Fabrication of Porous Poly(3-hydroxybutyrate-co-3-hydroxyhexanoate) Monoliths via Thermally Induced Phase Separation
Source: MDPI journal article supplement (doi:10.3390/polym8030066), 2016-02-29
Supplement: s1 [file s1]

# Supplementary Materials: Fabrication of Porous Poly(3-hydroxybutyrate-co-3-hydroxyhexanoate) Monoliths via Thermally Induced Phase Separation

Takashi Tsujimoto \*, Nao Hosoda and Hiroshi Uyama

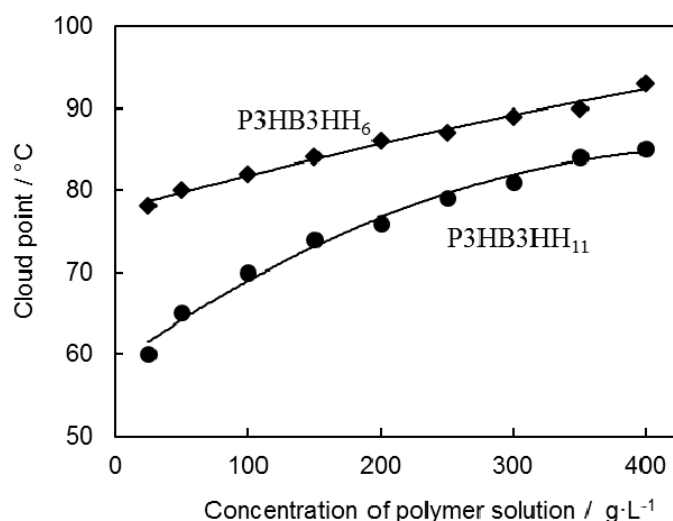

Figure S1. Cloud point curves of P3HB3HH<sub>x</sub>/DMSO solution.

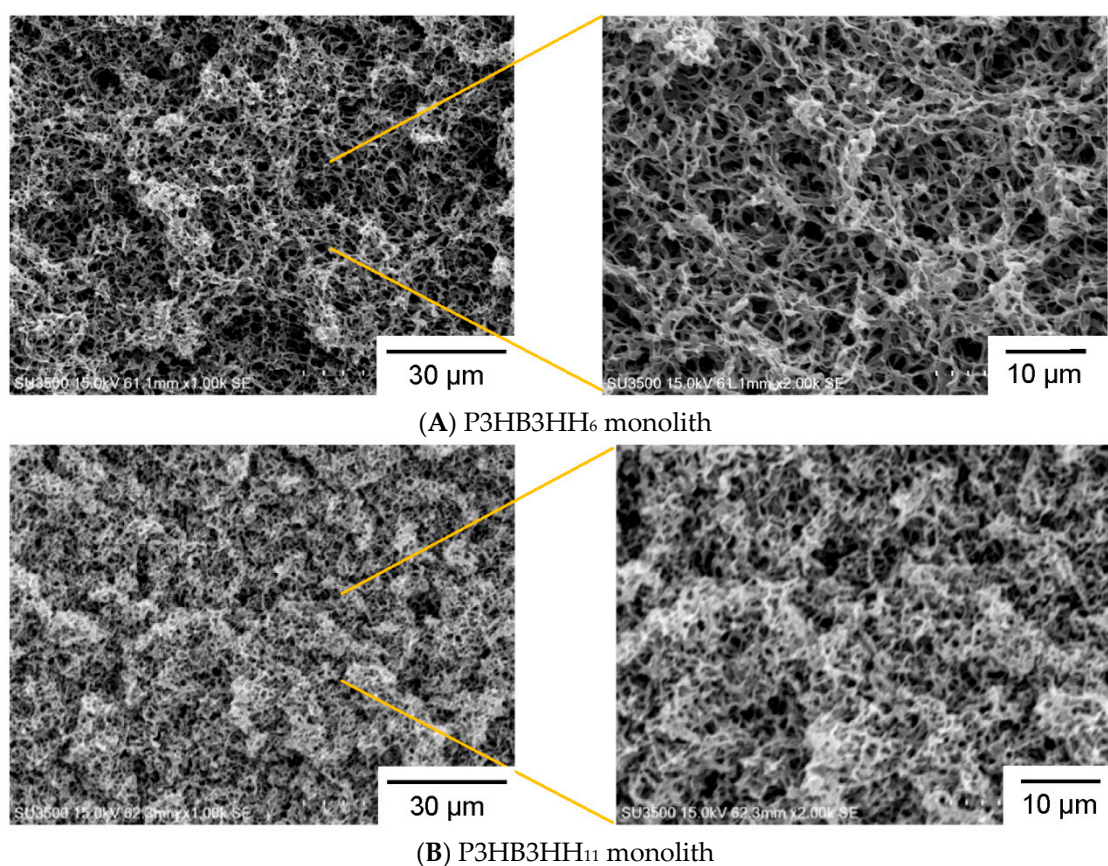

Figure S2. SEM images of (A) P3HB3HH<sub>6</sub> monolith (100 g·L<sup>-1</sup>) and (B) P3HB3HH<sub>11</sub> monolith (100 g·L<sup>-1</sup>).

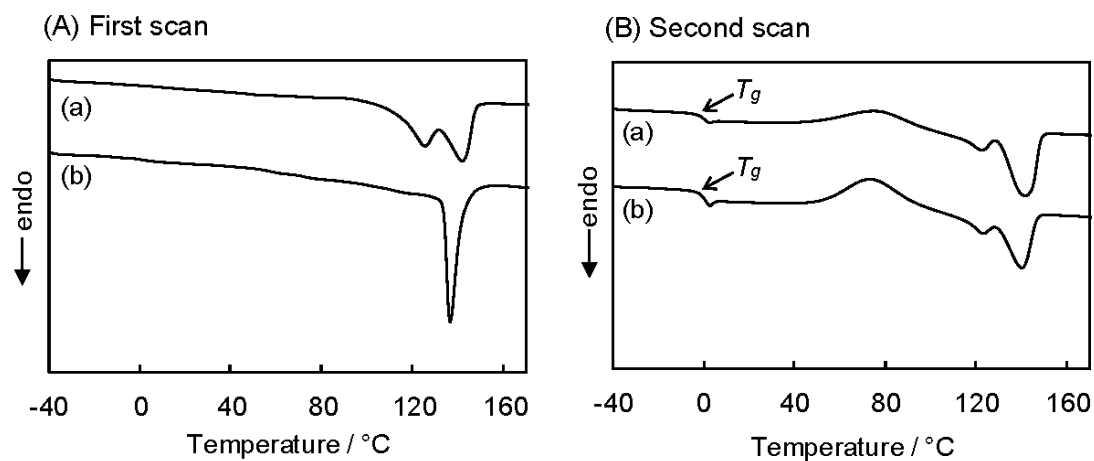

Figure S3. DSC curves of (a) P3HB3HH<sub>6</sub> monolith (100 g·L<sup>-1</sup>), and (b) P3HB3HH<sub>6</sub> powder; (A) first heating scan, and (B) second heating scan.

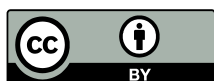

© 2016 by the authors; licensee MDPI, Basel, Switzerland. This article is an open access article distributed under the terms and conditions of the Creative Commons by Attribution (CC-BY) license (<http://creativecommons.org/licenses/by/4.0/>).
